# Supplementary material
Source: PubMed Central journal article supplement (PMC4933171)
Supplement: 10.1074_M115.702944_jbc.M115.702944-1.pdf [file 10.1074_M115.702944_jbc.M115.702944-1.pdf]

## SUPPLEMENTAL DATA

### Biochemical and structural characterization of a five-domain GH115- $\alpha$ -glucuronidase from the marine bacterium *Saccharophagus degradans* 2-40<sup>T</sup>

Weijun Wang<sup>1,¶</sup>, Ruoyu Yan<sup>1,¶</sup>, Boguslaw P. Nocek<sup>2</sup>, Thu V. Vuong<sup>1</sup>, Rosa Di Leo<sup>1</sup>, Xiaohui Xu<sup>1</sup>, Hong Cui<sup>1</sup>, Paul Gatenholm<sup>3</sup>, Guillermo Toriz<sup>3,4</sup>, Maija Tenkanen<sup>5</sup>, Alexei Savchenko<sup>1,\*</sup>, Emma R. Master<sup>1,\*</sup>

<sup>1</sup>Department of Chemical Engineering and Applied Chemistry, University of Toronto, 200 College Street, Toronto, Ontario, M5S 3E5, Canada.

<sup>2</sup>The Structure Biology Center, Biosciences Division Argonne National Laboratory, Argonne IL, USA

<sup>3</sup>Department of Chemistry and Chemical Engineering, Wallenberg Wood Science Center and Biopolymer Technology, Chalmers University of Technology, Kemivägen 4, Gothenburg, 412 96, Sweden

<sup>4</sup>Department of Wood, Cellulose and Paper Research, University of Guadalajara, Guadalajara 44100, Mexico

<sup>5</sup> Department of Food and Environmental Sciences, University of Helsinki, P.O. Box 27, Helsinki 00014, Finland

<sup>¶</sup>: These authors contributed equally to this work.

**Running title:** A five-domain GH115  $\alpha$ -glucuronidase

\*To whom correspondence should be addressed:

Emma R. Master

Telephone: 416-946-7861

Fax: 416-978-8605

Email: [emma.master@utoronto.ca](mailto:emma.master@utoronto.ca)

Alexei Savchenko

Telephone: 416-978-3925

Fax: 416- 978-8605

Email: [alexei.savchenko@utoronto.ca](mailto:alexei.savchenko@utoronto.ca)

SUPPLEMENTAL TABLES

Table S1. Protein representatives structurally related to SdeAgu115A and specific sub-domains.

| PDB code            | Z score | rmsd | lali (number of aligned residues) | nres (total number of residues) | % sequence identity in structurally consd. Regs. | Protein                     | Family | Organism                              |
|---------------------|---------|------|-----------------------------------|---------------------------------|--------------------------------------------------|-----------------------------|--------|---------------------------------------|
| <b>Whole enzyme</b> |         |      |                                   |                                 |                                                  |                             |        |                                       |
| 4C90                | 53.1    | 2.4  | 656                               | 822                             | 41                                               | $\alpha$ -Glucuronidase     | GH115  | <i>Bacteroides ovatus</i>             |
| 5BV3                | 38.3    | 2.1  | 713                               | 759                             | 31                                               | $\alpha$ -Glucuronidase     | GH115  | <i>Bacteroides thetaiotaomicron</i>   |
| 2VUR                | 24.0    | 6.2  | 471                               | 584                             | 13                                               | O-GlcNAcase                 | GH84   | <i>Clostridium perfringens</i>        |
| 1K9E                | 22.6    | 4.7  | 469                               | 671                             | 14                                               | $\alpha$ -Glucuronidase     | GH67   | <i>Bacillus stearothermophilus</i>    |
| 4H04                | 10.7    | 2.6  | 117                               | 633                             | 19                                               | Lacto- <i>N</i> -biosidase  | GH20   | <i>Bifidobacterium bifidum</i>        |
| <b>Domain A</b>     |         |      |                                   |                                 |                                                  |                             |        |                                       |
| 4C90                | 22.8    | 1.5  | 160                               | 811                             | 36                                               | $\alpha$ -Glucuronidase     | GH115  | <i>Bacteroides ovatus</i>             |
| 5BV3                | 19.0    | 1.4  | 140                               | 759                             | 25                                               | $\alpha$ -Glucuronidase     | GH115  | <i>Bacteroides thetaiotaomicron</i>   |
| 1H41                | 14.0    | 2.2  | 124                               | 700                             | 19                                               | $\alpha$ -Glucuronidase     | GH67   | <i>Cellvibrio japonicus</i>           |
| 1K9D                | 12.4    | 2.5  | 118                               | 670                             | 15                                               | $\alpha$ -Glucuronidase     | GH67   | <i>Geobacillus stearothermophilus</i> |
| 3GH7                | 11.0    | 2.5  | 117                               | 506                             | 17                                               | Beta-N-acetylhexosaminidase | GH20   | <i>Paenibacillus sp.</i>              |
| 4H04                | 10.7    | 2.2  | 1.0                               | 633                             | 19                                               | Lacto- <i>N</i> -biosidase  | GH20   | <i>Bifidobacterium bifidum</i>        |
| 2YDQ                | 10.3    | 2.5  | 114                               | 579                             | 20                                               | O-GlcNAcase                 | GH84   | <i>Clostridium perfringens</i>        |

| PDB code                               | Z score | rmsd | lali (number of aligned residues) | nres (total number of residues) | % sequence identity in structurally consd. Regs. | Protein                                    | Family | Organism                              |
|----------------------------------------|---------|------|-----------------------------------|---------------------------------|--------------------------------------------------|--------------------------------------------|--------|---------------------------------------|
| <b>Domain B<br/>(Catalytic domain)</b> |         |      |                                   |                                 |                                                  |                                            |        |                                       |
| 4C90                                   | 37.4    | 1.3  | 285                               | 822                             | 54                                               | $\alpha$ -Glucuronidase                    | GH115  | <i>Bacteroides ovatus</i>             |
| 2EPK                                   | 15.2    | 3.7  | 239                               | 613                             | 9                                                | N-acetyl-beta-D-glucosaminidase            | GH20   | <i>Streptococcus gordonii</i>         |
| 3S6T                                   | 15.0    | 3.4  | 242                               | 575                             | 12                                               | N-acetyl-beta-D-glucosaminidase            | GH20   | <i>Ostrinia furnacalis</i>            |
| 2CBI                                   | 14.9    | 3.2  | 231                               | 584                             | 10                                               | O-GlcNAcase (OGA),                         | GH84   | <i>Clostridium perfringens</i>        |
| 1K9D                                   | 13.8    | 4    | 242                               | 670                             | 13                                               | $\alpha$ -Glucuronidase                    | GH67   | <i>Geobacillus stearothermophilus</i> |
| <b>Domain C</b>                        |         |      |                                   |                                 |                                                  |                                            |        |                                       |
| 4C90                                   | 25.0    | 0.9  | 174                               | 811                             | 29                                               | $\alpha$ -Glucuronidase                    | GH115  | <i>Bacteroides ovatus</i>             |
| 5BV3                                   | 14.9    | 1.8  | 154                               | 759                             | 25                                               | $\alpha$ -Glucuronidase                    | GH115  | <i>Bacteroides thetaiotaomicron</i>   |
| 4P3F                                   | 7.2     | 3.4  | 112                               | 193                             | 5                                                | SRP68 RNA-binding domain                   | -      | <i>Homo sapiens</i>                   |
| 2EPN                                   | 7.1     | 3.9  | 146                               | 623                             | 5                                                | N-acetyl-beta-D-glucosaminidase            | GH20   | <i>Streptococcus gordonii</i>         |
| 1YWT                                   | 6.8     | 3.7  | 111                               | 222                             | 5                                                | 14-3-3 $\sigma$ protein                    | -      | <i>Homo sapiens</i>                   |
| <b>Domain C<sup>+</sup></b>            |         |      |                                   |                                 |                                                  |                                            |        |                                       |
| 1L4I                                   | 10.3    | 2.6  | 95                                | 189                             | 12                                               | S pilus periplasmic chaperone SfaE         | -      | <i>Escherichia coli</i>               |
| 3BWU                                   | 10.3    | 2.5  | 95                                | 200                             | 12                                               | Chaperone protein fimC                     | -      | <i>Escherichia coli</i>               |
| 3ZMR                                   | 10.1    | 2.8  | 87                                | 469                             | 17                                               | Bacon-domain in BoGH5A(endo-xyloglucanase) | -      | <i>Bacteroides ovatus</i>             |

| <b>PDB code</b> | <b>Z score</b> | <b>rmsd</b> | <b>lali (number of aligned residues)</b> | <b>nres (total number of residues)</b> | <b>% sequence identity in structurally consd. Regs.</b> | <b>Protein</b>                                          | <b>Family</b> | <b>Organism</b>                     |
|-----------------|----------------|-------------|------------------------------------------|----------------------------------------|---------------------------------------------------------|---------------------------------------------------------|---------------|-------------------------------------|
| <b>Domain D</b> |                |             |                                          |                                        |                                                         |                                                         |               |                                     |
| 4C90            | 21.4           | 2.1         | 167                                      | 811                                    | 26                                                      | $\alpha$ -Glucuronidase                                 | GH115         | <i>Bacteroides ovatus</i>           |
| 5BV3            | 13.9           | 2.0         | 132                                      | 759                                    | 17                                                      | $\alpha$ -Glucuronidase                                 | GH115         | <i>Bacteroides thetaiotaomicron</i> |
| 4CRR            | 13.1           | 1.8         | 112                                      | 124                                    | 16                                                      | C-terminal CBM6 in a GH16 laminariase                   | CBM6          | <i>Zobellia galactanivorans</i>     |
| 2CDO            | 12.7           | 2.2         | 117                                      | 137                                    | 12                                                      | CBM6 in a beta-agarase                                  | CBM6          | <i>Saccharophagus degradans</i>     |
| 3ZM8            | 12.3           | 2.3         | 119                                      | 444                                    | 11                                                      | C-CBM35 in GH26 endo- $\beta$ -1,4-mannanase (PaMan26A) | CBM35         | <i>Podospora anserina</i>           |

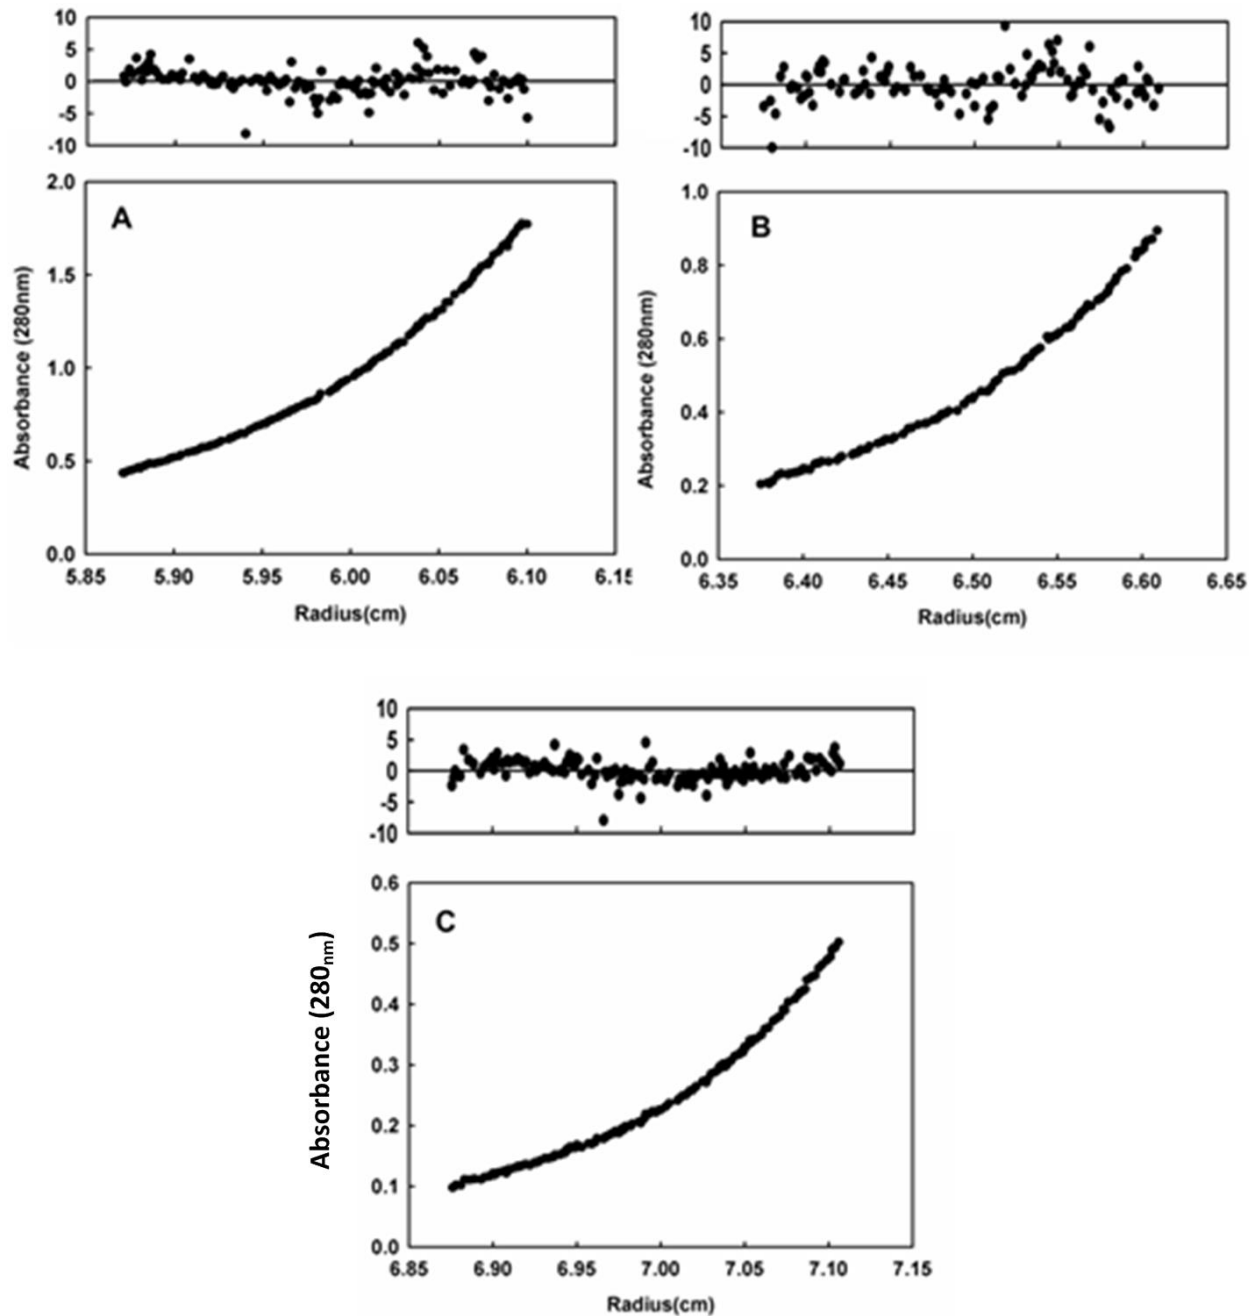

**Fig. S1 Equilibrium analytical ultracentrifugation analysis to probe the oligomeric state of SdeAgu115A.** The equilibrium profile and the residuals of the fit for the data obtained at 20°C for SdeAgu115A at concentration of 5.9  $\mu\text{M}$  (A); 3.0  $\mu\text{M}$  (B); 1.5  $\mu\text{M}$  (C) in 20 mM HEPES buffer pH7.0 containing 300 mM NaCl. The rotor speed for the displayed data was 7000 rpm in a Beckman Optima XL-A analytical ultracentrifuge. The weight-average molecular weight of native SdeAgu115A was determined to be  $189 \pm 3.9$  kD.
